# Supplementary material for: Self-assembly and multicolor emission of core/shell structured CaWO4:Na+/Ln3+ spheres
Source: Royal Society of Chemistry journal article supplement (doi:10.1039/b810648g), 2008-01-01
Supplement: b810648g.pdf [file b810648g.pdf]

# Supporting Information

## Self-assembly and multicolor emission of core/shell structured CaWO<sub>4</sub>:Na<sup>+</sup>/Ln<sup>3+</sup> spheres

Yiguo Su, Liping Li and Guangshe Li\*

*State Key Lab of Structural Chemistry, Fujian Institute of Research on the Structure  
of Matter and Graduate School of Chinese Academy of Sciences, Fuzhou 350002,  
P.R. China. Fax: +86-591-83714946; Tel: +86-591-83702122; E-mail:  
guanshe@fjirsm.ac.cn*

**Table S1** Initial molar ratios and those measured by ICP technique for the as-prepared samples CaWO<sub>4</sub>:Na<sup>+</sup>/Ln<sup>3+</sup>

| Ln <sup>3+</sup> | Initial molar ratios<br>Ca:Ln:W | ICP results*<br>Na:Ca:Ln:W | Formula                                                      |
|------------------|---------------------------------|----------------------------|--------------------------------------------------------------|
| Dy <sup>3+</sup> | 0.925 : 0.075 : 1               | 0.128 : 0.858 : 0.071 : 1  | Ca <sub>0.858</sub> (Dy,Na) <sub>0.142</sub> WO <sub>4</sub> |
| Tb <sup>3+</sup> | 0.85 : 0.15 : 1                 | 0.131 : 0.744 : 0.128 : 1  | Ca <sub>0.744</sub> (Tb,Na) <sub>0.256</sub> WO <sub>4</sub> |
| Sm <sup>3+</sup> | 0.925 : 0.075 : 1               | 0.165 : 0.884 : 0.058 : 1  | Ca <sub>0.884</sub> (Sm,Na) <sub>0.116</sub> WO <sub>4</sub> |
| Eu <sup>3+</sup> | 0.925 : 0.075 : 1               | 0.121 : 0.868 : 0.066 : 1  | Ca <sub>0.868</sub> (Eu,Na) <sub>0.132</sub> WO <sub>4</sub> |

\* In the as-prepared samples, the concentration of Na<sup>+</sup> ions is larger than Ln<sup>3+</sup> (Ln=Dy, Tb, Sm, Eu). The presence of excess sodium in all samples may be the consequence of the co-doping of Ln<sup>3+</sup> and Na<sup>+</sup> at Ca<sup>2+</sup> sites and the excess surface adsorption of Na<sup>+</sup>.

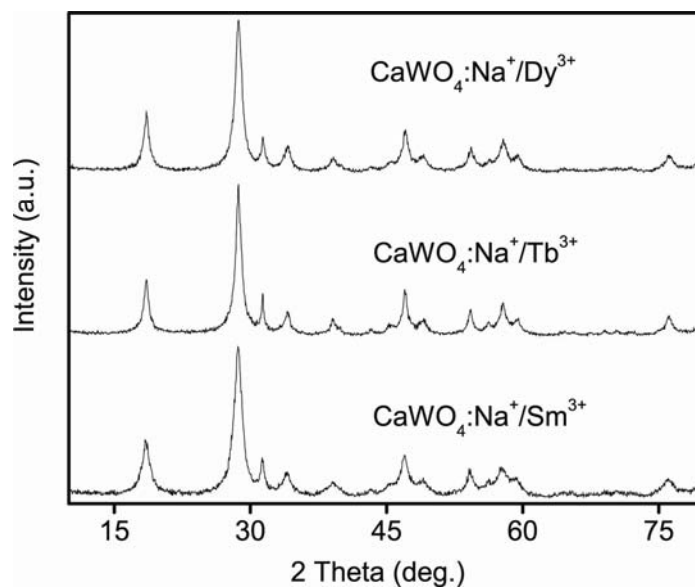

**Fig. S2** XRD patterns of  $\text{CaWO}_4:\text{Na}^+/\text{Ln}^{3+}$  spheres ( $\text{Ln} = \text{Dy}, \text{Tb}, \text{Sm}$ ). These XRD data matched well that for  $\text{Ln}=\text{Eu}$ . Using the Scherrer formula for (101) diffraction peak, the mean sizes for  $\text{Ln} = \text{Dy}, \text{Tb}$ , and  $\text{Sm}$  were calculated to be 11.5, 11.7, and 7.7 nm, respectively.

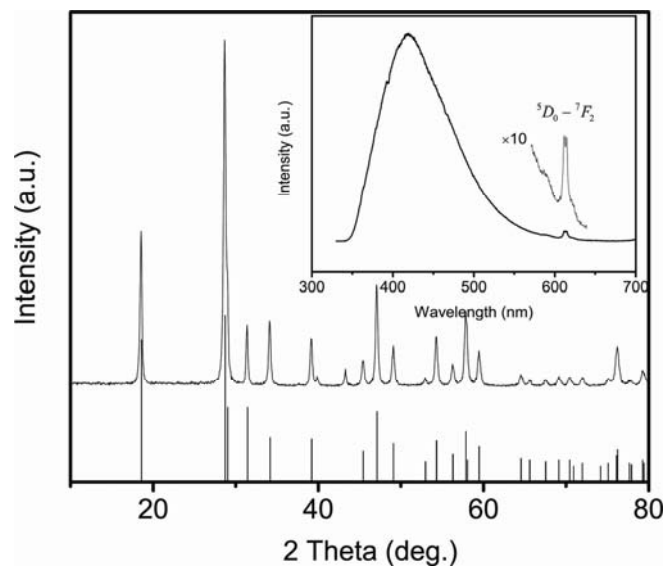

**Fig. S3** XRD pattern of  $\text{CaWO}_4:\text{Na}^+/\text{Eu}^{3+}$  prepared in the citric acid free system. Inset is the corresponding emission spectrum.

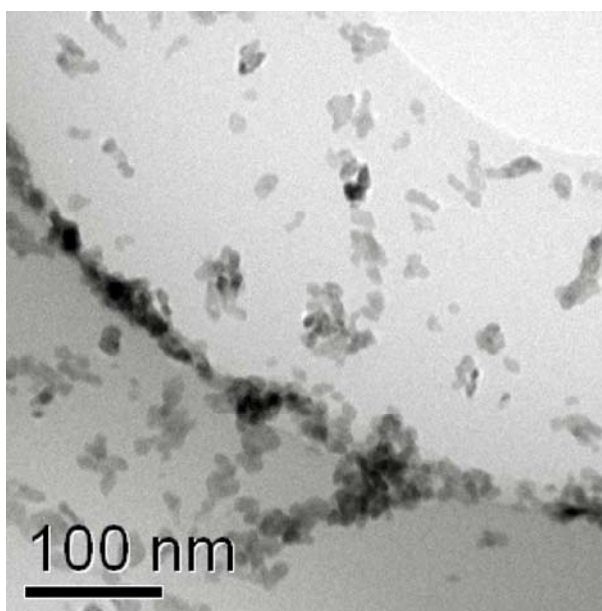

**Fig. S4** TEM image of  $\text{CaWO}_4$  nanocrystals prepared in the PVP free system. The as-prepared  $\text{CaWO}_4$  consists of nearly dispersed nanoparticles with a spindly shape. The diameter of spindly particle was about 16 nm.

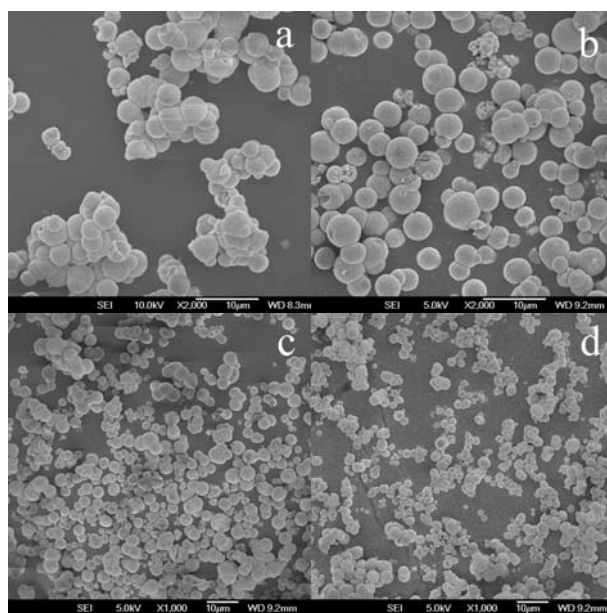

**Fig. S5** SEM images of CaWO<sub>4</sub> spheres prepared with different PVP contents of (a) 0.3g, (b) 1.2g, (c) 1.8g, and (d) 2.4g.

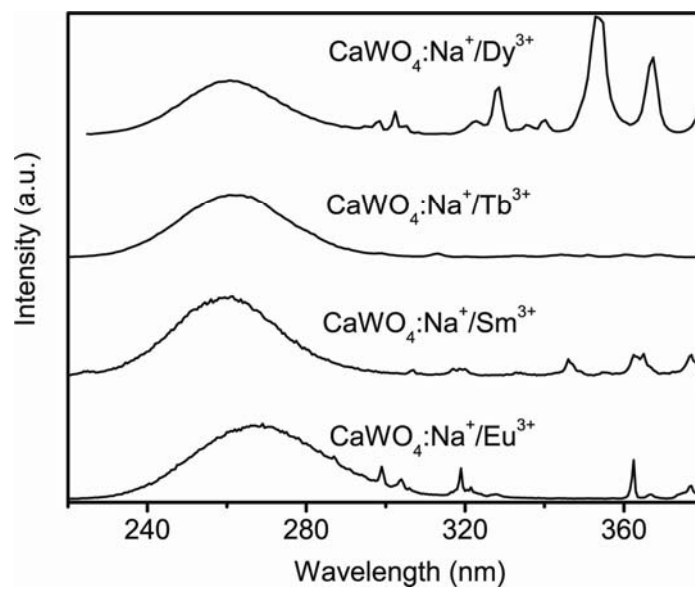

**Fig. S6** Excitation spectra of the as-prepared CaWO<sub>4</sub>:Na<sup>+</sup>/Ln<sup>3+</sup> spheres (Ln=Dy, Tb, Sm, Eu).

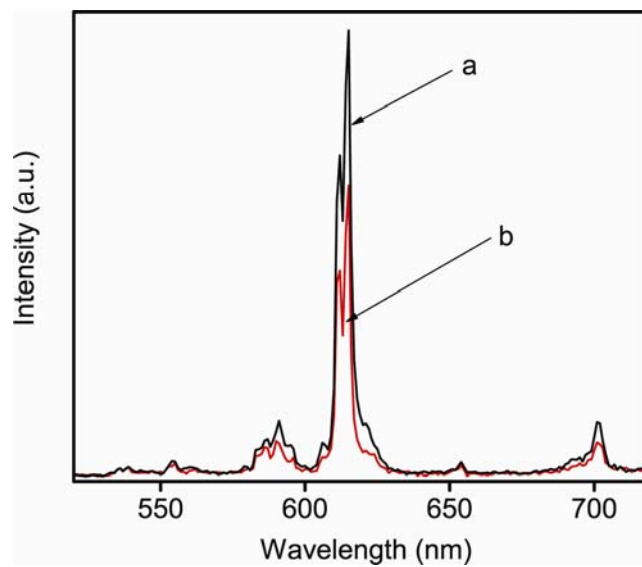

**Fig. S7** Emission spectra of (a)  $\text{CaWO}_4:\text{Na}^+/\text{Eu}^{3+}$  spheres and (b)  $\text{CaWO}_4:\text{Na}^+/\text{Ln}^{3+}$  nanocrystals prepared in the absence of PVP.
